# Supplementary material for: The Development of an Ultra-Performance Liquid Chromatography–Tandem Mass Spectrometry Method for Biogenic Amines in Fish Samples
Source: MDPI journal article supplement (doi:10.3390/molecules28010184), 2022-12-26
Supplement: s1 [file s1]

# Supplementary Materials

## The Development of an Ultra-Performance Liquid Chromatography–Tandem Mass Spectrometry Method for Biogenic Amines in Fish Samples

Tong Li, Ruiguo Wang and Peilong Wang \*

Institute of Quality Standards and Testing Technology for Agro-Products,  
Chinese Academy of Agricultural Sciences, Beijing 10081, China; litong@caas.cn  
(T.L.); wangruiguo@caas.cn (R.W.)

\* Correspondence: wangpeilong@caas.cn; Tel.: +86-10-82106582

**Table S1.** Extraction recoveries of 14 BAs derivatives with different extraction reagents. FA means formic acid, AA means acetic acid, ACN means acetonitrile.

| Name                   | extraction reagents |                   |                   |                   |                   |
|------------------------|---------------------|-------------------|-------------------|-------------------|-------------------|
|                        | ACN                 | 0.1% FA in<br>ACN | 0.5% FA in<br>ACN | 0.1% AA in<br>ACN | 0.5% FA in<br>ACN |
| Histamine              | 55.1 ± 7.4%         | 80.1 ± 4.7%       | 82.4 ± 5.6%       | 44.2 ± 2.6%       | 80.1 ± 4.7%       |
| Tyramine               | 32.1 ± 4.8%         | 75.2 ± 5.1%       | 76.1 ± 7.5%       | 52.1 ± 7.5%       | 75.2 ± 5.1%       |
| Dopamine               | 28.9 ± 8.1%         | 91.3 ±<br>10.7%   | 91.2 ± 7.1%       | 48.2 ± 8.2%       | 91.3 ±<br>10.7%   |
| Tryptamine             | 38.3 ± 5.2%         | 78.8 ± 4.2%       | 79.0 ±<br>11.8%   | 68.1 ±<br>12.4%   | 78.8 ± 4.2%       |
| Serotonin              | 64.5 ± 7.4%         | 89.2 ± 6.1%       | 82.5 ±<br>13.0%   | 33.3 ±<br>10.0%   | 86.5 ± 7.7%       |
| Putrescine             | 22.1 ± 8.2%         | 93.1 ± 3.4%       | 92.3 ± 6.7%       | 26.4 ±<br>12.0%   | 82.9 ±<br>13.4%   |
| Spermine               | 27.3 ±<br>11.4%     | 92.1 ± 6.4%       | 84.2 ± 2.6%       | 44.2 ± 2.6%       | 90.4 ± 8.5%       |
| Spermidine             | 61.2 ± 9.8%         | 75.2 ± 8.8%       | 78.1 ± 8.3%       | 31.7 ±<br>17.2%   | 69.3 ±<br>12.3%   |
| Octopamine             | 32.1 ±<br>10.1%     | 91.6 ± 0.8%       | 91.2 ± 9.5%       | 29.2 ±<br>10.4%   | 90.4 ± 5.6%       |
| Benzylamine            | 58.3 ± 9.2%         | 88.8 ± 6.2%       | 88.1 ±<br>11.0%   | 60.2 ± 9.2%       | 78.8 ± 2.6%       |
| 1-<br>Phenylethylamine | 33.5 ± 7.9%         | 89.2 ± 7.2%       | 92.5 ±<br>12.7%   | 62.5 ± 3.7%       | 82.7 ± 4.7%       |
| Cadaverine             | 17.7 ± 8.6%         | 90.1 ± 8.4%       | 84.3 ± 6.3%       | 14.3 ± 8.2%       | 92.2 ± 6.4%       |
| 2-Phenethylamine       | 21.8 ±<br>17.5%     | 81.3 ± 5.7%       | 76.4 ±<br>16.2%   | 55.5 ±<br>12.7%   | 82.7 ±<br>10.4%   |
| Agmatine               | 9.3 ± 15.3%         | 77.2 ± 6.4%       | 74.3 ± 5.7%       | 54.3 ± 6.3%       | 72.5 ± 9.4%       |

**Table S2.** Sensitivities of BAs (1000 nM) standard solution derived with benzoyl chloride, dansyl chloride and pyridine-3-sulfonyl chloride.

| Name               | derivatization reagents |                    |                              |
|--------------------|-------------------------|--------------------|------------------------------|
|                    | benzoyl chloride        | dansyl chloride    | pyridine-3-sulfonyl chloride |
| Histamine          | $4.66 \times 10^6$      | $1.29 \times 10^6$ | $9.27 \times 10^5$           |
| Tyramine           | $1.05 \times 10^7$      | $4.93 \times 10^6$ | $1.36 \times 10^6$           |
| Dopamine           | $1.37 \times 10^7$      | $9.38 \times 10^5$ | $8.03 \times 10^5$           |
| Tryptamine         | $1.62 \times 10^7$      | $7.39 \times 10^6$ | $1.07 \times 10^5$           |
| Serotonin          | $5.15 \times 10^6$      | $3.87 \times 10^6$ | $1.36 \times 10^6$           |
| Putrescine         | $2.70 \times 10^6$      | $1.88 \times 10^6$ | $1.08 \times 10^6$           |
| Spermine           | $1.96 \times 10^6$      | $1.96 \times 10^6$ | $1.33 \times 10^6$           |
| Spermidine         | $1.23 \times 10^6$      | $1.06 \times 10^6$ | $7.11 \times 10^5$           |
| Octopamine         | $2.70 \times 10^6$      | $2.59 \times 10^6$ | $2.16 \times 10^5$           |
| Benzylamine        | $1.86 \times 10^7$      | $2.93 \times 10^6$ | $3.40 \times 10^5$           |
| 1-Phenylethylamine | $1.91 \times 10^7$      | $7.04 \times 10^5$ | $5.87 \times 10^5$           |
| Cadaverine         | $2.30 \times 10^7$      | $9.97 \times 10^6$ | $7.11 \times 10^5$           |
| 2-Phenethylamine   | $2.08 \times 10^7$      | $8.56 \times 10^6$ | $2.72 \times 10^6$           |
| Agmatine           | $1.37 \times 10^7$      | $5.16 \times 10^6$ | $3.40 \times 10^5$           |

**Table S3.** Response of each BAs derivatives under different conditions (concentration of benzoyl chloride and vortex time) of derivatization.

| Name               | Concentration of of benzoyl chloride |                    |                    |                    |                    | Reaction time      |                    |                    |                    |
|--------------------|--------------------------------------|--------------------|--------------------|--------------------|--------------------|--------------------|--------------------|--------------------|--------------------|
|                    | 1%                                   | 2%                 | 3%                 | 4%                 | 10%                | 5 min              | 10 min             | 20 min             | 30 min             |
| Histamine          | $8.40 \times 10^6$                   | $1.60 \times 10^7$ | $1.52 \times 10^7$ | $1.20 \times 10^7$ | $8.80 \times 10^6$ | $1.28 \times 10^7$ | $1.40 \times 10^7$ | $1.64 \times 10^7$ | $1.60 \times 10^7$ |
| Tyramine           | $1.80 \times 10^7$                   | $4.64 \times 10^7$ | $4.56 \times 10^7$ | $3.60 \times 10^7$ | $3.04 \times 10^7$ | $3.60 \times 10^7$ | $4.64 \times 10^7$ | $4.76 \times 10^7$ | $3.96 \times 10^7$ |
| Dopamine           | $2.16 \times 10^7$                   | $5.12 \times 10^7$ | $4.84 \times 10^7$ | $4.16 \times 10^7$ | $2.40 \times 10^7$ | $3.00 \times 10^7$ | $3.44 \times 10^7$ | $5.12 \times 10^7$ | $4.04 \times 10^7$ |
| Tryptamine         | $2.68 \times 10^7$                   | $5.60 \times 10^7$ | $3.96 \times 10^7$ | $3.56 \times 10^7$ | $3.04 \times 10^7$ | $3.60 \times 10^7$ | $4.88 \times 10^7$ | $5.56 \times 10^7$ | $5.60 \times 10^7$ |
| Serotonin          | $8.40 \times 10^6$                   | $1.76 \times 10^7$ | $1.76 \times 10^7$ | $1.64 \times 10^7$ | $1.28 \times 10^7$ | $4.00 \times 10^6$ | $6.40 \times 10^6$ | $1.80 \times 10^7$ | $1.84 \times 10^7$ |
| Putrescine         | $4.80 \times 10^6$                   | $1.76 \times 10^7$ | $1.36 \times 10^7$ | $8.00 \times 10^6$ | $4.40 \times 10^6$ | $8.80 \times 10^6$ | $1.56 \times 10^7$ | $1.68 \times 10^7$ | $1.76 \times 10^7$ |
| Spermine           | $2.40 \times 10^6$                   | $1.64 \times 10^7$ | $6.40 \times 10^6$ | $3.60 \times 10^6$ | $3.60 \times 10^6$ | $6.80 \times 10^6$ | $1.32 \times 10^7$ | $1.76 \times 10^7$ | $1.68 \times 10^7$ |
| Spermidine         | $2.80 \times 10^6$                   | $1.68 \times 10^7$ | $1.56 \times 10^7$ | $3.20 \times 10^6$ | $3.20 \times 10^6$ | $1.12 \times 10^7$ | $1.68 \times 10^7$ | $1.80 \times 10^7$ | $1.52 \times 10^7$ |
| Octopamine         | $3.60 \times 10^6$                   | $1.56 \times 10^7$ | $1.28 \times 10^7$ | $2.00 \times 10^6$ | $1.60 \times 10^6$ | $6.40 \times 10^6$ | $1.56 \times 10^7$ | $1.60 \times 10^7$ | $1.52 \times 10^7$ |
| Benzylamine        | $3.08 \times 10^7$                   | $6.24 \times 10^7$ | $5.64 \times 10^7$ | $4.80 \times 10^6$ | $2.60 \times 10^7$ | $3.40 \times 10^7$ | $4.92 \times 10^7$ | $4.96 \times 10^7$ | $4.88 \times 10^7$ |
| 1-Phenylethylamine | $3.08 \times 10^7$                   | $4.80 \times 10^7$ | $4.32 \times 10^7$ | $3.52 \times 10^6$ | $2.24 \times 10^7$ | $3.64 \times 10^7$ | $4.80 \times 10^7$ | $4.84 \times 10^7$ | $4.68 \times 10^7$ |
| Cadaverine         | $3.92 \times 10^7$                   | $6.40 \times 10^7$ | $5.16 \times 10^7$ | $3.08 \times 10^6$ | $2.68 \times 10^7$ | $3.92 \times 10^7$ | $5.44 \times 10^7$ | $6.44 \times 10^7$ | $6.36 \times 10^7$ |
| 2-Phenethylamine   | $3.40 \times 10^7$                   | $8.00 \times 10^7$ | $7.92 \times 10^7$ | $6.80 \times 10^6$ | $3.60 \times 10^7$ | $3.40 \times 10^7$ | $8.00 \times 10^7$ | $8.44 \times 10^7$ | $8.12 \times 10^7$ |
| Agmatine           | $2.24 \times 10^7$                   | $3.20 \times 10^7$ | $2.64 \times 10^7$ | $1.60 \times 10^6$ | $8.40 \times 10^6$ | $2.24 \times 10^7$ | $3.20 \times 10^7$ | $3.24 \times 10^7$ | $3.04 \times 10^7$ |

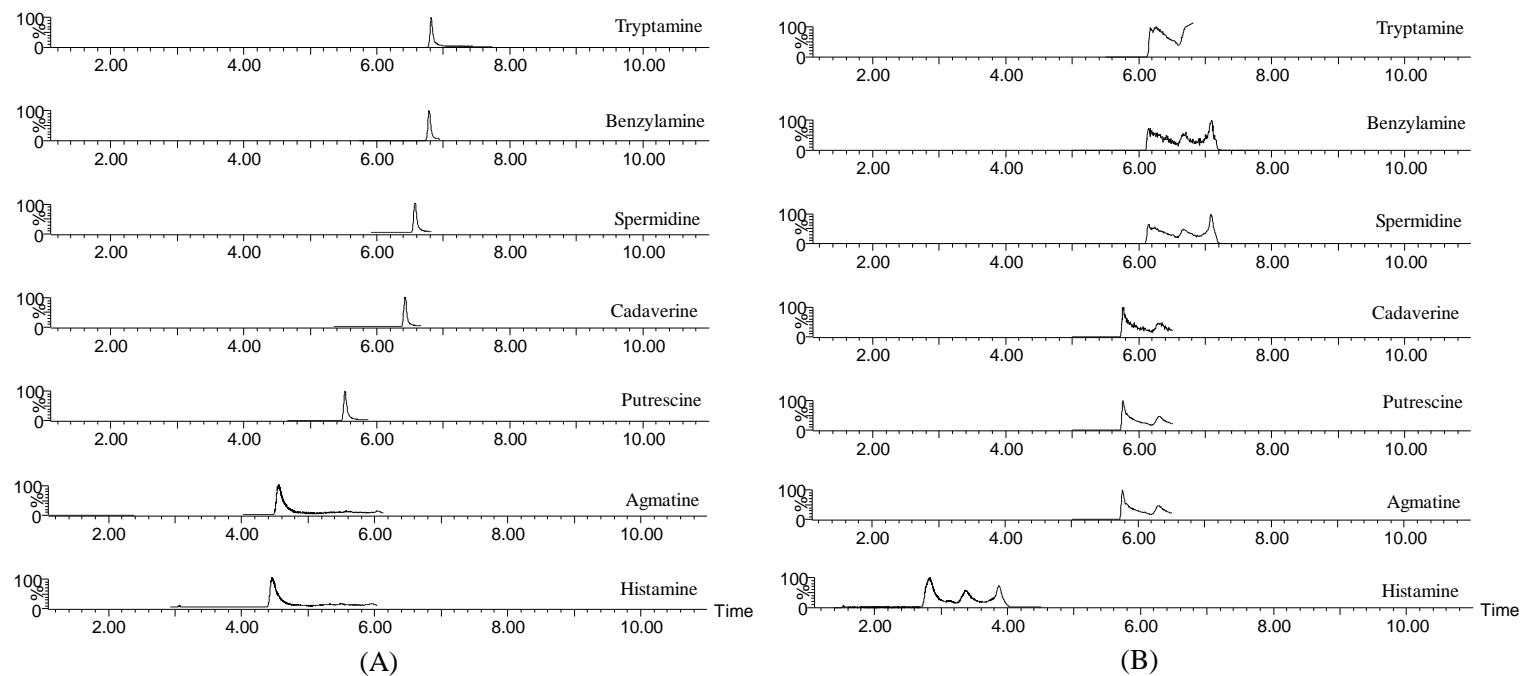

**Figure S1.** Chromatogram of 7 BAs derivatives in 1000 nM standards mixture. Results show that the chromatographic peak is obviously broadened or even trailing, when the flow rate was 0.2 mL/min (Figure S1A). Chromatography peak shapes were unsatisfactory, when the mobile phase A was water and phase B was acetonitrile (Figure S1B).

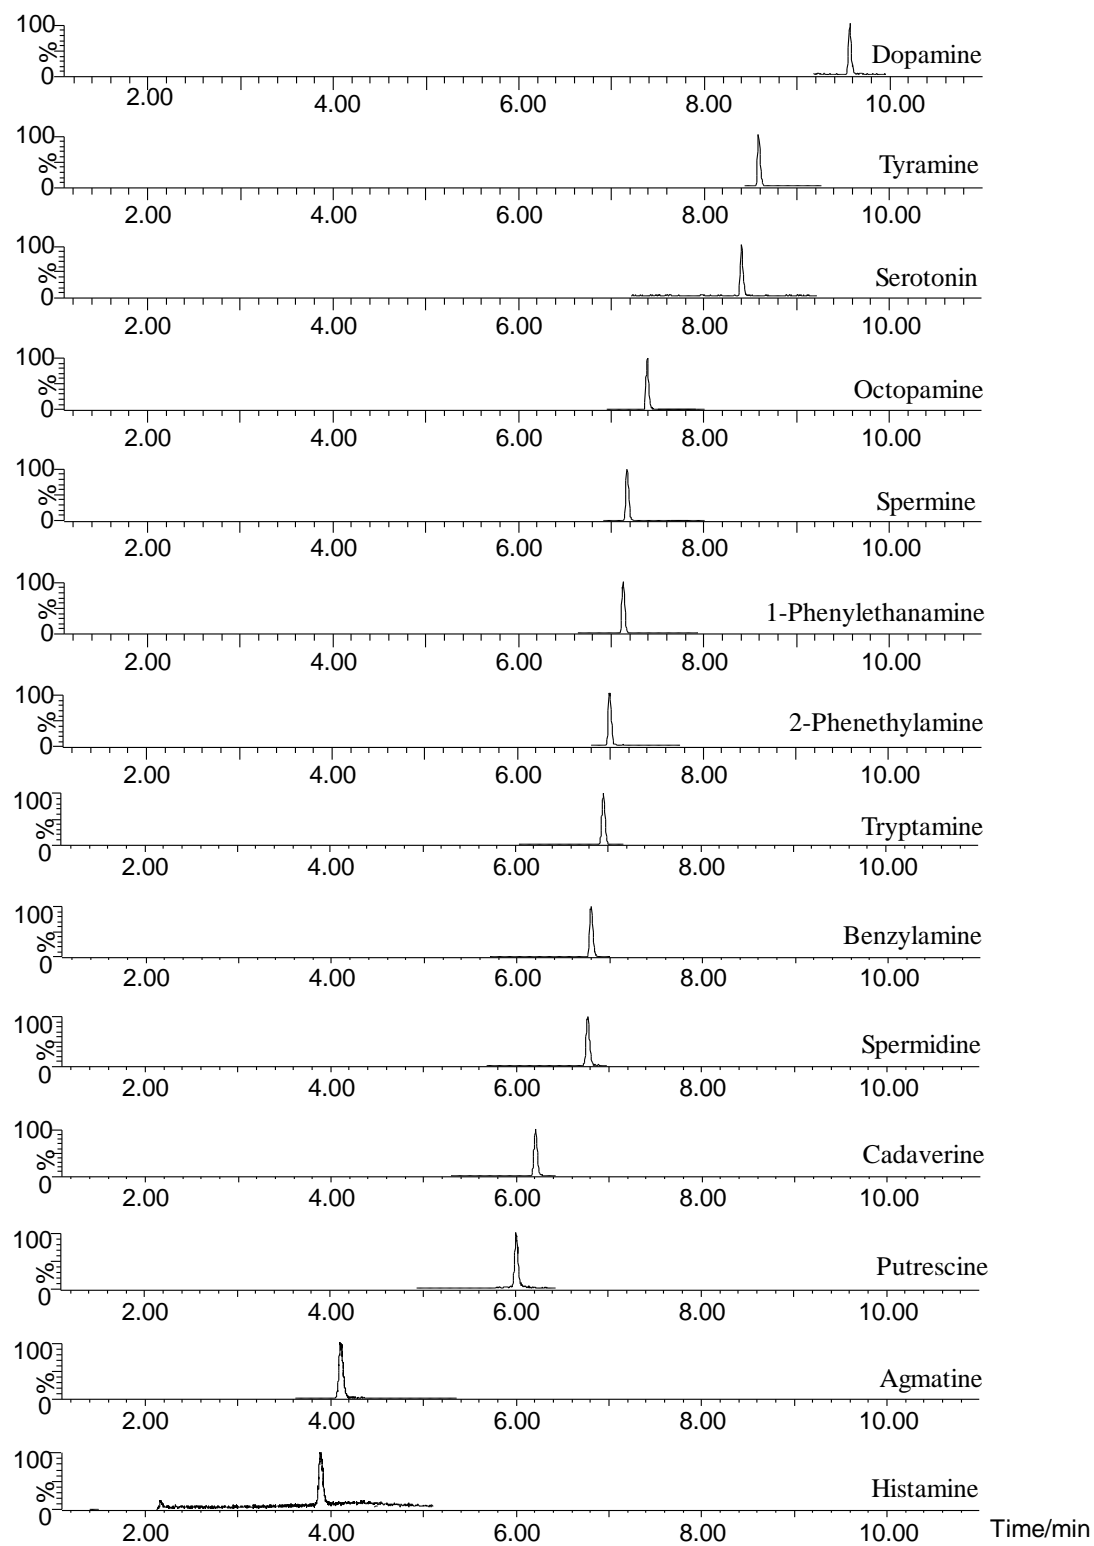

**Figure S2.** Chromatogram of 14 derivatized BAs in spiked fish sample (1000 nM).

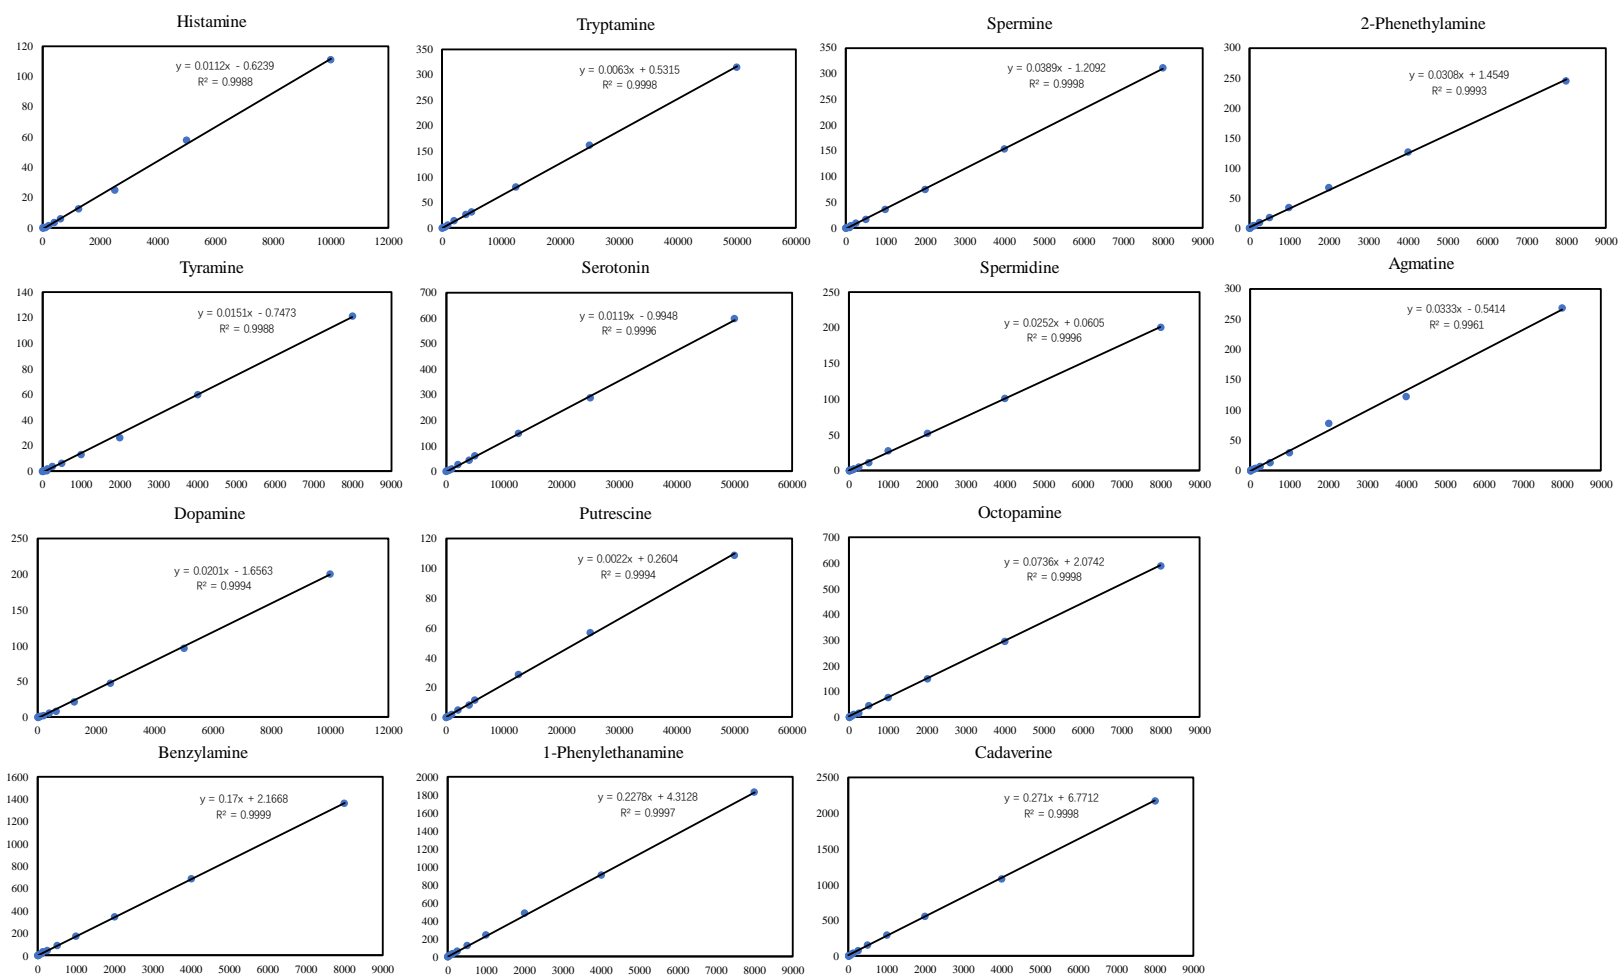

**Figure S3.** Graphs of calibration curves with data points of 14 BAs derivatives.

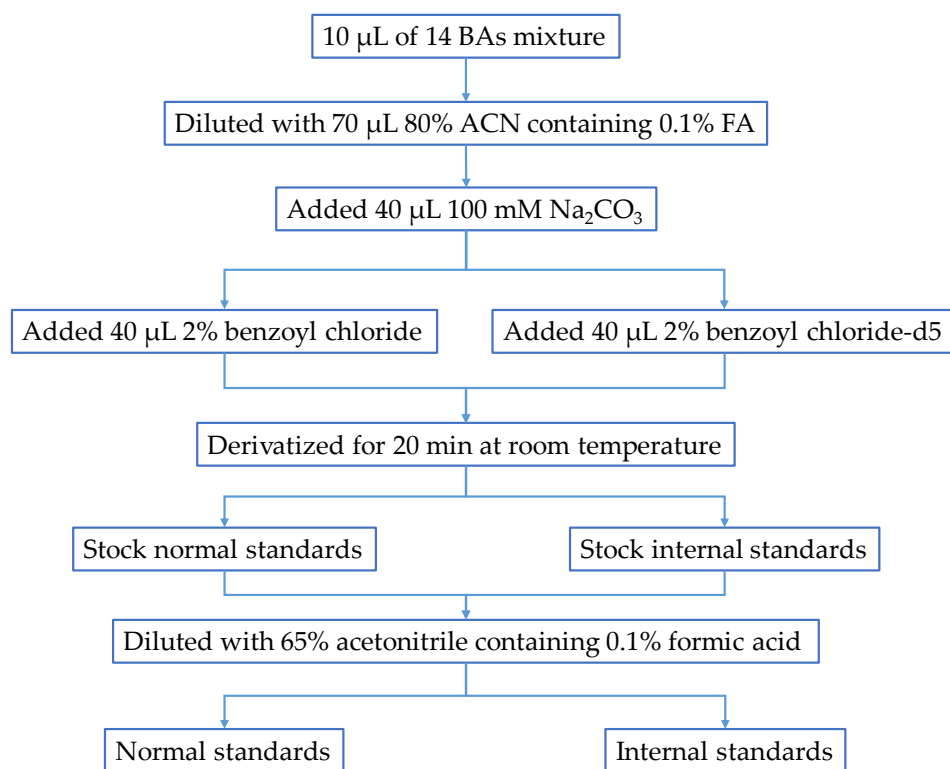

**Figure S4.** A flow chart for the steps of derivatization of standards.

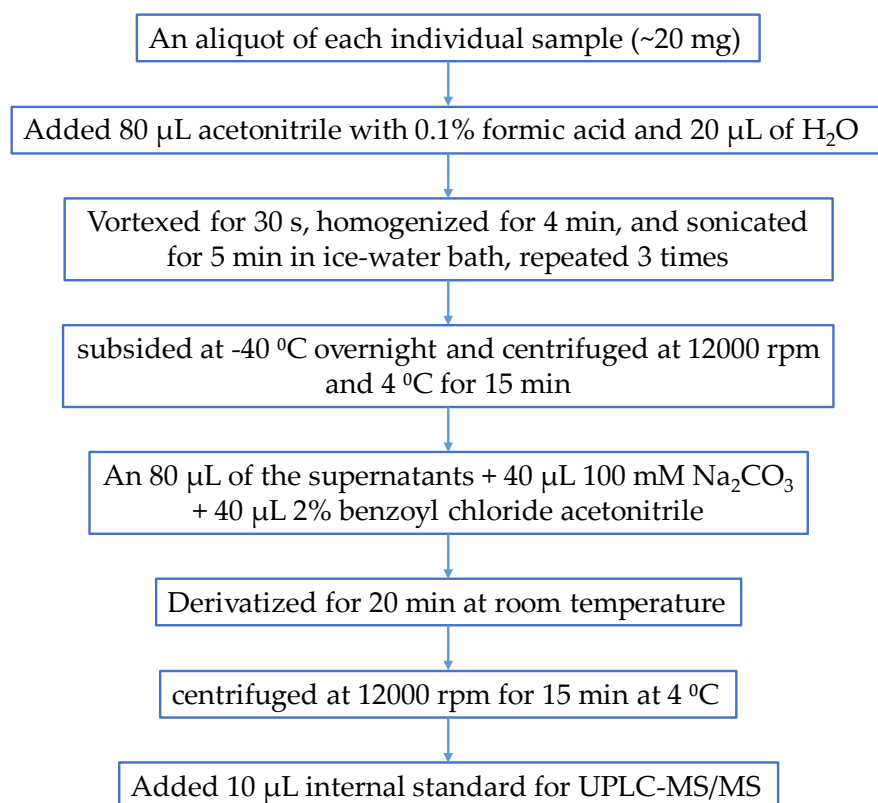

**Figure S5.** A flow chart for the steps of derivatization of fish samples.
